# Supplementary material for: Decreased Paneth cell α-defensins promote fibrosis in a choline-deficient L-amino acid-defined high-fat diet-induced mouse model of nonalcoholic steatohepatitis via disrupting intestinal microbiota
Source: Sci Rep. 2023 Mar 9;13:3953. doi: 10.1038/s41598-023-30997-y (PMC9998432; doi:10.1038/s41598-023-30997-y)
Supplement: Supplementary file 1 — Supplementary Information. [file 41598_2023_30997_MOESM1_ESM.pdf]

## Supplementary Information

### **Decreased Paneth cell $\alpha$ -defensins promote fibrosis in a choline-deficient L-amino acid-defined high-fat diet-induced mouse model of nonalcoholic steatohepatitis via disrupting intestinal microbiota**

Shunta Nakamura<sup>1,2</sup>, Kiminori Nakamura<sup>1,3\*</sup>, Yuki Yokoi<sup>1,3</sup>, Yu Shimizu<sup>3</sup>, Shuya Ohira<sup>1</sup>, Mizu

Hagiwara<sup>1</sup>, Zihao Song<sup>1</sup>, Li Gan<sup>1</sup>, Tomoyasu Aizawa<sup>1,4</sup>, Daigo Hashimoto<sup>5</sup>, Takanori Teshima<sup>5</sup>,

Andre J. Ouellette<sup>6</sup>, and Tokiyoshi Ayabe<sup>1,3\*</sup>

<sup>1</sup>Graduate School of Life Science, Hokkaido University, Sapporo, Japan. <sup>2</sup>Hokkaido Laboratory, Corporate Research & Development Division, Nitto Denko Corporation, Sapporo, Japan.

<sup>3</sup>Department of Cell Biological Science, Faculty of Advanced Life Science, Hokkaido University, Sapporo, Japan. <sup>4</sup>Department of Advanced Transdisciplinary Science, Faculty of Advanced Life Science, Hokkaido University, Sapporo, Japan. <sup>5</sup>Department of Hematology, Faculty of Medicine, Hokkaido University, Sapporo, Japan. <sup>6</sup>Department of Pathology and Laboratory Medicine, Keck School of Medicine, University of Southern California, Los Angeles, California, USA.

## Supplementary Figures

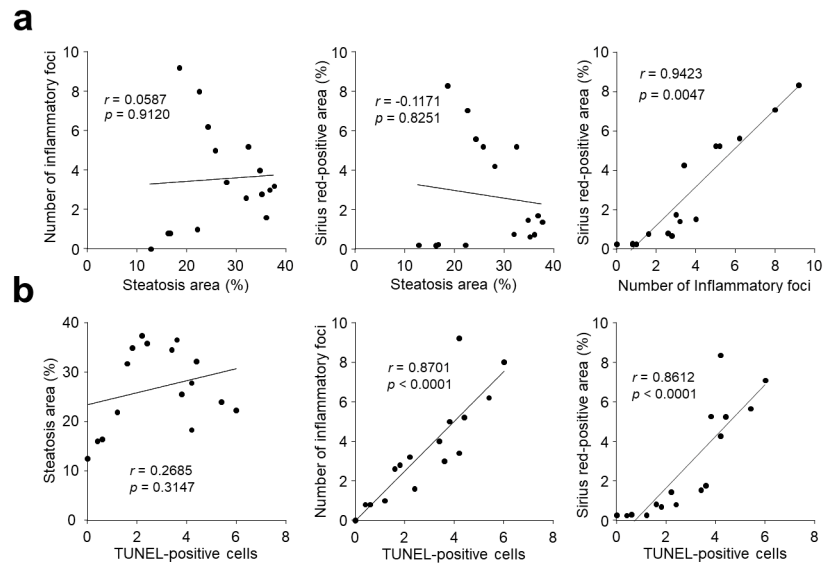

**Supplementary Figure 1. Progression of liver fibrosis in the CDAHFD group is associated with hepatic inflammation and apoptosis. a** Correlation analysis between steatosis area, the number of inflammatory foci and fibrosis area using CDAHFD group data at 1, 3, 6, and 12 wk. **b** Correlation analysis between the number of TUNEL-positive cells, steatosis area, the number of inflammatory foci and fibrosis area using CDAHFD group data at 1, 3, 6, and 12 wk. (**a** and **b**)  $r$  and  $P$  values by Pearson correlation test are presented.

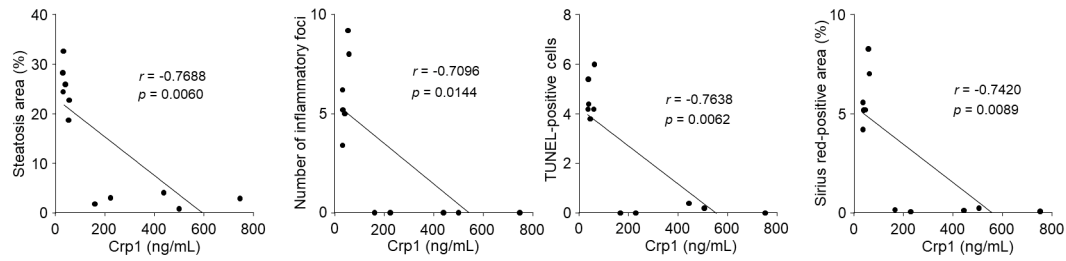

**Supplementary Figure 2. Decreased secretion of Crp1 in intestinal lumen is associated with hepatic steatosis, inflammation, apoptosis, and fibrosis.** Correlation analysis between fecal Crp1 levels and NASH pathology including steatosis area, the number of inflammatory foci, the number of TUNEL positive cells, and Sirius red-positive area using SD and CDAHFD group data at 12 wk.  $r$  and  $P$  values by Pearson correlation test are presented.

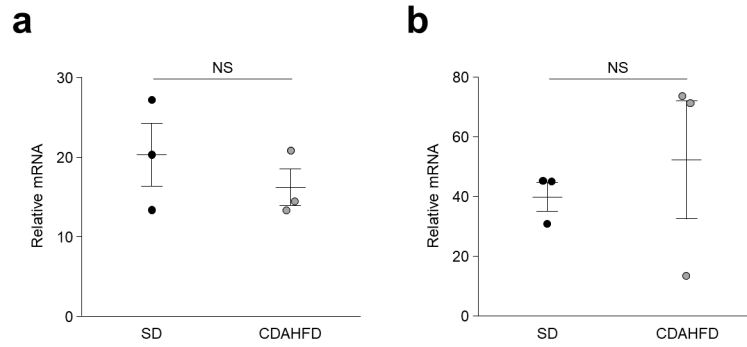

**Supplementary Figure 3. Expression of Crp1 is not affected by CDAHFD.** mRNA levels of Crp1 in ileum of SD and CDAHFD group at 3 wk (**a**), and 6 wk (**b**) analyzed by real time-PCR. Data are shown as mean  $\pm$  SEM for  $n = 3$  per group. The data represent mean  $\pm$  SEM.  $*P < 0.05$ , by unpaired 2-tailed Student's  $t$  test. NS, not significant.

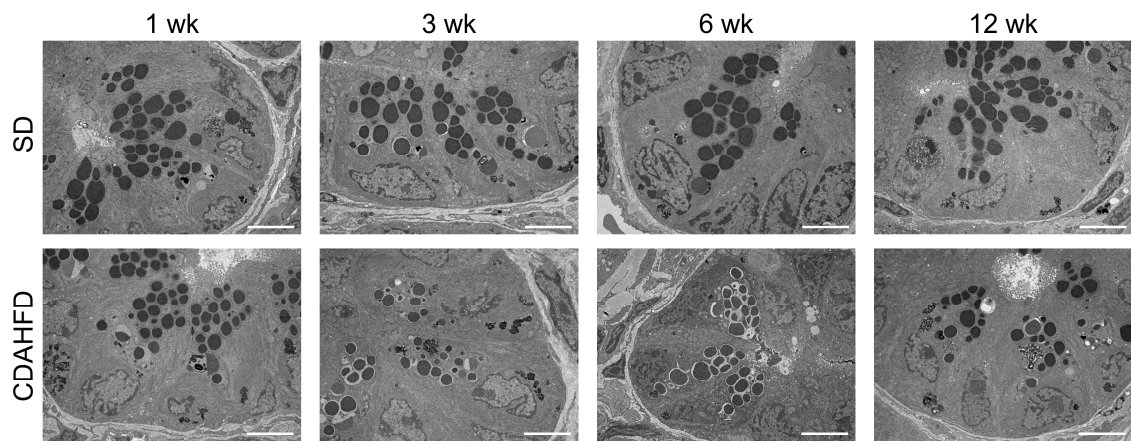

**Supplementary Figure 4. Abnormal Paneth cell granules are observed in the CDAHFD group.**

Representative images of transmission electron microscopy of Paneth cells at the base of the ileal crypts in SD and CDAHFD group at 1, 3, 6, and 12 wk. Paneth cells in the SD group have tightly packed electron-dense core granules, in contrast, Paneth cells in the CDAHFD group have fewer loosely packed granules with a halo appearance.  $n = 1$  for each group. Scale bars: 5  $\mu\text{m}$ .

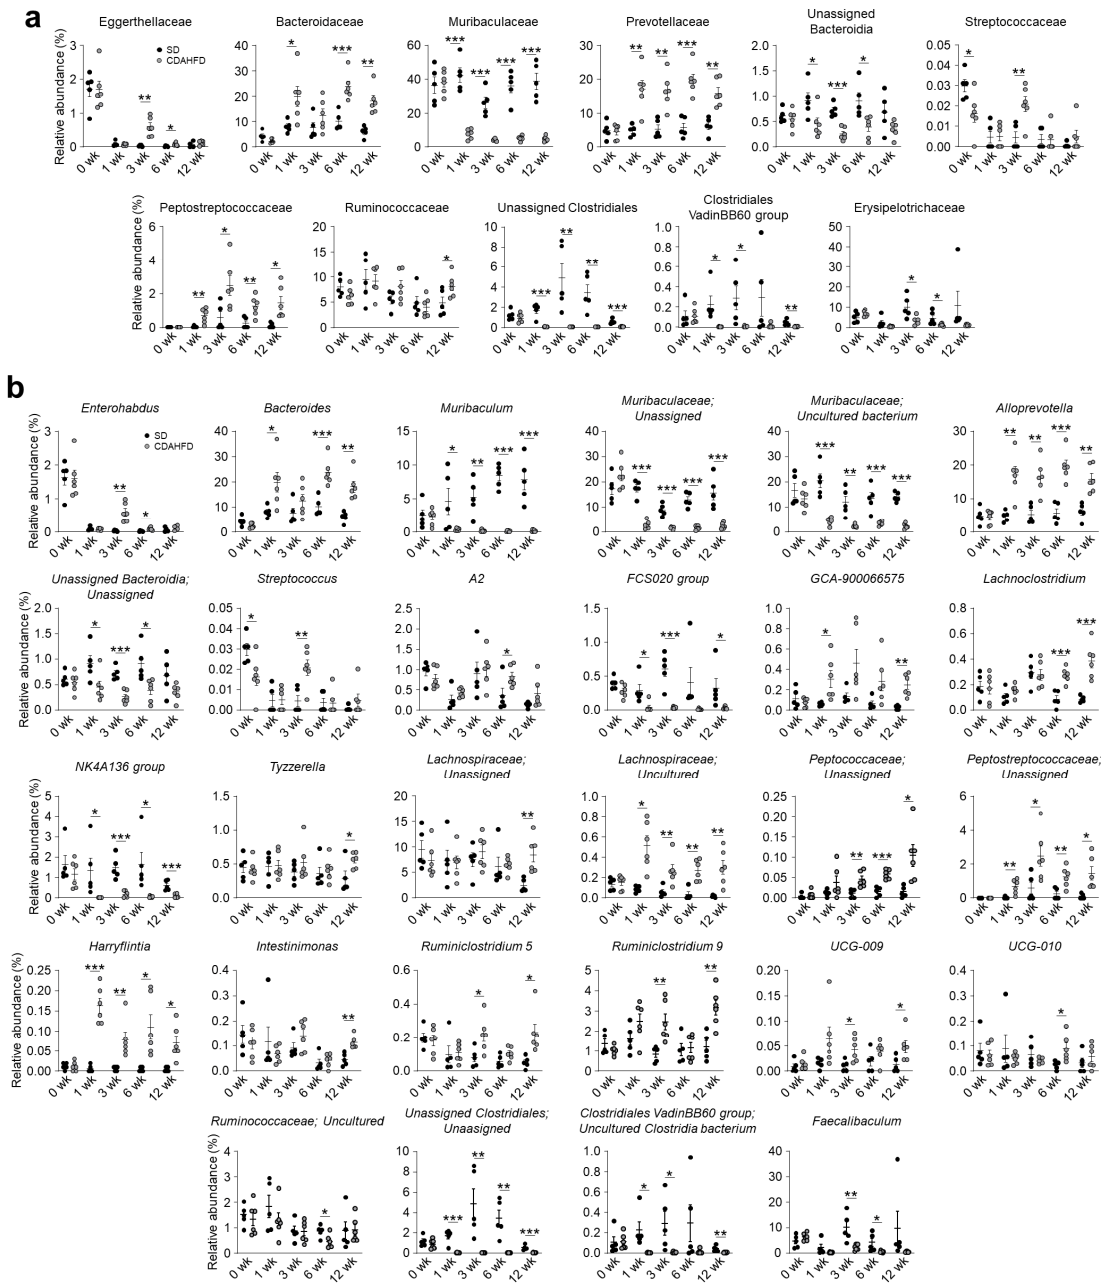

**Supplementary Figure 5. Phylogenetic comparison of the intestinal microbiota in SD and CDAHFD groups.** Relative abundance of individual genera that were significantly different between the SD and CDAHFD groups at the family (**a**) and genus level (**b**). Data are shown as mean  $\pm$  SEM for  $n = 5-6$  per group. \* $P < 0.05$ , \*\* $P < 0.01$  and \*\*\* $P < 0.001$ , by unpaired 2-tailed Student's  $t$  test.

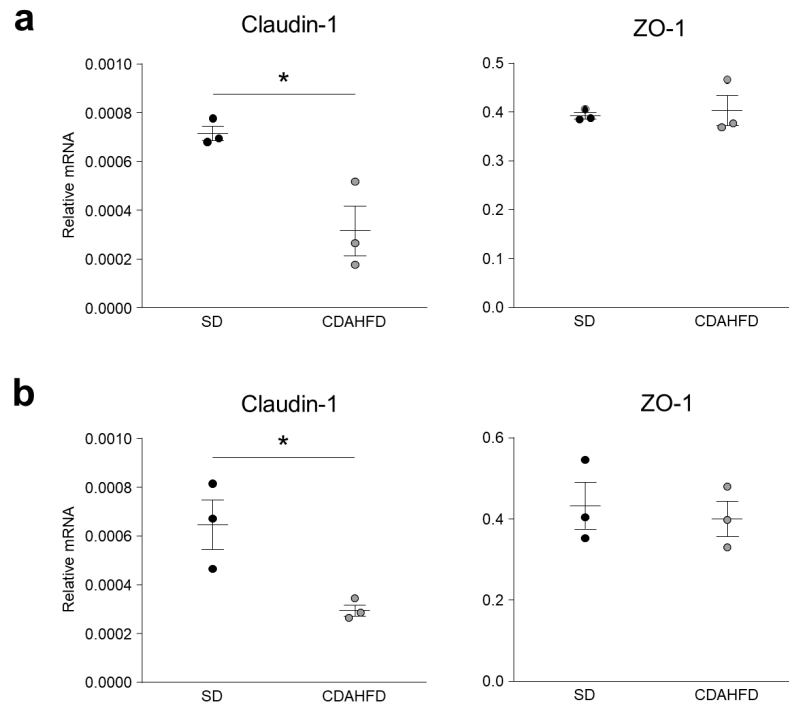

**Supplementary Figure 6. mRNA expression of claudin-1 decreased in the ileum of the CDAHFD group.** mRNA expression of tight junction proteins, claudin-1 and ZO-1, in the ileum of SD and CDAHFD group at 3 wk (**a**) and 6 wk (**b**) analyzed by real-time PCR. \* $P < 0.05$ , \*\* $P < 0.01$  and \*\*\* $P < 0.001$ , by unpaired 2-tailed Student's t test.

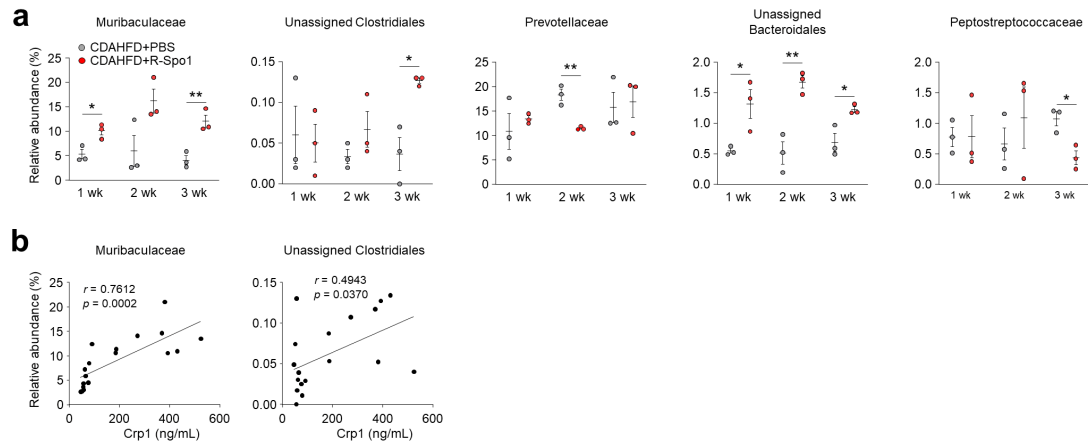

**Supplementary Figure 7. R-Spo1 treatment prevents intestinal dysbiosis at the family level. a**

Relative abundance of individual genera that were significantly recovered in CDAHFD+R-Spo1 group from CDAHFD mice of 11 family in supplementary Fig. 5a. Data are shown as mean  $\pm$  SEM for  $n = 3$  per group. \* $P < 0.05$ , \*\* $P < 0.01$  and \*\*\* $P < 0.001$ , by unpaired 2-tailed Student's  $t$  test. **b** Correlation analysis between fecal Crp1 levels and relative abundance of individual genera CDAHFD+PBS and CDAHFD+R-Spo1 group.  $r$  and  $P$  values by Pearson correlation test are presented.



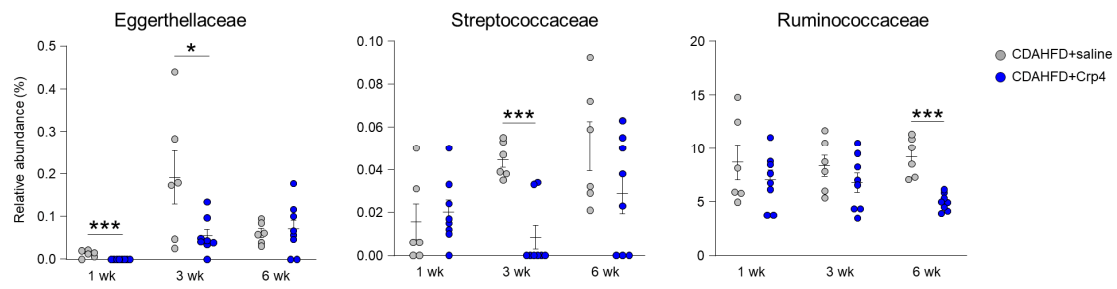

**Supplementary Figure 9. Oral administration of Crp4 attenuates intestinal dysbiosis at family level.** Relative abundance of individual genera that were significantly recovered in CDAHFD+Crp4 group from CDAHFD group of 11 family in Supplemental Fig. 5a. Data are shown as mean  $\pm$  SEM for  $n = 6-8$  per group. \* $P < 0.05$ , \*\* $P < 0.01$  and \*\*\* $P < 0.001$ , by unpaired 2-tailed Student's  $t$  test.

## Supplementary Table 1

Differentially expressed genes and their functional clustering associated with Paneth cell function measured by RNA-seq in Paneth cells of the SD and CDAHFD group.

| Function            | Entrez Gene ID | Gene symbol    | Description                                                                               | Log <sub>2</sub> (CDAHFD/SD) |
|---------------------|----------------|----------------|-------------------------------------------------------------------------------------------|------------------------------|
| Ion transporter     | 12351          | <i>Car4</i>    | carbonic anhydrase 4                                                                      | 1.4896                       |
|                     | 381812         | <i>Cracr2a</i> | calcium release activated channel regulator 2A                                            | -0.5982                      |
|                     | 12638          | <i>Cftr</i>    | cystic fibrosis transmembrane conductance regulator                                       | -0.8138                      |
|                     | 16535          | <i>Kcnq1</i>   | potassium voltage-gated channel, subfamily Q, member 1                                    | -0.8197                      |
|                     | 16534          | <i>Kcnn4</i>   | potassium intermediate/small conductance calcium-activated channel, subfamily N, member 4 | -1.0385                      |
| Oxidative stress    | 69065          | <i>Chac1</i>   | ChaC, cation transport regulator 1                                                        | 0.8618                       |
|                     | 11865          | <i>Arntl1</i>  | aryl hydrocarbon receptor nuclear translocator-like 1                                     | -2.0807                      |
| Glycosylation       | 21982          | <i>Tmem165</i> | transmembrane protein 165                                                                 | 0.6842                       |
| Secretion           | 20910          | <i>Stxbp1</i>  | syntaxin binding protein 1                                                                | 0.6202                       |
| Vesicle transporter | 71648          | <i>Optn</i>    | optineurin                                                                                | -0.6083                      |
|                     | 76510          | <i>Trappc9</i> | trafficking protein particle complex 9                                                    | -0.6181                      |
|                     | 22318          | <i>Vamp2</i>   | vesicle-associated membrane protein 2                                                     | -0.6436                      |
|                     | 320615         | <i>Dop1a</i>   | DOP1 leucine zipper like protein A                                                        | -0.6872                      |
|                     | 328778         | <i>Rab26</i>   | RAB26, member RAS oncogene family                                                         | -0.7285                      |
|                     | 80877          | <i>Lrba</i>    | LPS-responsive beige-like anchor                                                          | -0.7782                      |
|                     | 76688          | <i>Arfp1</i>   | ADP-ribosylation factor related protein 1                                                 | -0.7875                      |
|                     | 260302         | <i>Gga3</i>    | golgi associated, gamma adaptin ear containing, ARF binding protein 3                     | -0.8248                      |
| Autophagy           | 226541         | <i>Klhl20</i>  | kelch-like 20                                                                             | -0.6205                      |
|                     | 101613         | <i>Nlrp6</i>   | NLR family, pyrin domain containing 6                                                     | -0.6714                      |
|                     | 11781          | <i>Ap4m1</i>   | adaptor-related protein complex AP-4, mu 1                                                | -0.7185                      |
|                     | 12217          | <i>Bsn</i>     | bassoon                                                                                   | -0.7440                      |

**Supplementary Table 2**

PCR primers

| Gene             | Primer sequence (5'-3')       | Universal Probe Library |
|------------------|-------------------------------|-------------------------|
| <i>Pdia3</i>     | F: TGGCCACTGTAAGAATCTGGA      | #33                     |
|                  | R: TGACAATATTTGGATCTTTGCTG    |                         |
| <i>Perk</i>      | F: CCTTGGTTTCATCTAGCCTCA      | #106                    |
|                  | R: ATCCAGGGAGGGGATGAT         |                         |
| <i>Chop</i>      | F: GCGACAGAGCCAGAATAACA       | #91                     |
|                  | R: GATGCACTTCCTTCTGGAACA      |                         |
| <i>Nox2</i>      | F: GATGCACTTCCTTCTGGAACA      | #20                     |
|                  | R: GTGCACAGCAAAGTGATTGG       |                         |
| <i>Prdx6</i>     | F: TTTCAATAGACAGTGTTGAGGATCA  | #1                      |
|                  | R: CCGTGGGTGTTTCACCAT         |                         |
| <i>Atg3</i>      | F: GTACCTGACCCCGGTCCT         | #78                     |
|                  | R: TTGGACAGTGGTGGACTAAGTG     |                         |
| <i>Atg12</i>     | F: CATTGACTTCATCAAAAAGTTCCTT  | #49                     |
|                  | R: GGCAAAGGACTGATTCACATAA     |                         |
| <i>Lc3b</i>      | F: CCCCACCAAGATCCCAGT         | #7                      |
|                  | R: CGCTCATGTTCACGTGGT         |                         |
| <i>F4/80</i>     | F: GGAGGACTTCTCCAAGCCTATT     | #42                     |
|                  | R: AGGCCTCTCAGACTTCTGCTT      |                         |
| <i>Cd11b</i>     | F: CAATAGCCAGCCTCAGTGC        | #76                     |
|                  | R: GAGCCCAGGGGAGAAGTG         |                         |
| <i>Cd11c</i>     | F: AGCCTCAAGACAGGACATCG       | #106                    |
|                  | R: TGAATCCTGGAGGGGATCT        |                         |
| <i>Tgfb1</i>     | F: CTGGGCACCATCCATGAC         | #68                     |
|                  | R: CAGTTCTTCTCTGTGGAGCTGA     |                         |
| <i>Trailr2</i>   | F: CCCTGAGATCTGCCAGTCAT       | #103                    |
|                  | R: TTTCTCTGGGGGTACAGGAA       |                         |
| <i>Bax</i>       | F: GAACCATCATGGGCTGGA         | #69                     |
|                  | R: GGTCCCAGAGTAGGAGAGGA       |                         |
| <i>Crp1</i>      | F: CCAAAACACAGATGAAGAGACTAAAA | #68                     |
|                  | R: GCATACCAGATCTCTCAACGATT    |                         |
| <i>Claudin-1</i> | F: ACTCCTTGCTGAATCTGAACAGT    | #18                     |
|                  | R: GGACACAAAGATTGCGATCAG      |                         |
| <i>ZO-1</i>      | F: TGCAGACCCAGCAAAGGT         | #12                     |
|                  | R: GGTTTTGTCTCATCATTCTTCAG    |                         |
| <i>HPRT-1</i>    | F: TCCTCCTCAGACCGCTTTT        | #95                     |
|                  | R: CCTGGTTCATCATCATCGGCTAATC  |                         |
